# Supplementary material for: Transcript abundance of stromal and thecal cell related genes during bovine ovarian development
Source: PubMed Central journal article supplement (PMC6411104; doi:10.1371/journal.pone.0213575), 2019-03-11
Supplement: pone.0213575.s001.pdf [file pone.0213575.s001.pdf]

**S1 Table. Genes and forward (F) and reverse (R) primers used for qRT-PCR and the amplified product size.**

| Gene name                                              | Gene Symbol    | GenBank Accession No. | Primers (5'-3')                                                | Size (bp) |
|--------------------------------------------------------|----------------|-----------------------|----------------------------------------------------------------|-----------|
| Androgen receptor                                      | <i>AR</i>      | NM_001244127.1        | F: TGCCCCTGACCTGGTTTTTC<br>R: TCGGACACACTGGCTGTACATC           | 67        |
| Collagen, type I, alpha 1                              | <i>COL1A1</i>  | NM_001034039.2        | F: TACTGGATTGACCCCAACCAAG<br>R: TCTCACCGGTTTCCATGTTG           | 73        |
| Collagen, type 3, alpha 1                              | <i>COL3A1</i>  | NM_001076831.1        | F: TTCCCGTAAAAACCCTGCAC<br>R: ACGTTTCCCAGTTTCCATG              | 146       |
| Cytochrome P450 family 11 subfamily A, member 1        | <i>CYP11A1</i> | NM_176644.2           | F: CACTTTCGCCACATCGAGAA<br>R: TGAATGATATAAACTGACTCCAAATTG<br>C | 85        |
| Cytochrome P450, family 17, subfamily A, polypeptide 1 | <i>CYP17A1</i> | NM_174304.2           | F: ACCATCAGAGAAGTGCTCCGAA<br>R: CCACAACGTCTGTGCCTTTGT          | 115       |
| Fibrillin 1                                            | <i>FBN1</i>    | NM_174053             | F: GGGATGGATTTTGTTCGAGGC<br>R: CATCACTGCAGCTACCTCCATT          | 126       |
| Fibrillin 2                                            | <i>FBN2</i>    | NM_001278588.1        | F: GGACTCCTACCAAGCAAGCATG<br>R: ACAAAGAACCCATTCTGGATG          | 62        |
| Fibrillin 3                                            | <i>FBN3</i>    | XM_010806885.1        | F: GCCACAGCCTGCCTAGATGT<br>R: CTGCCCTCAGTGTTTTTGCA             | 80        |
| Glyceraldehyde 3-phosphate dehydrogenase               | <i>GAPDH</i>   | NM_001034034.2        | F: ACCACTTTGGCATCGTGGAG<br>R: GGGCCATCCACAGTCTTCTG             | 76        |
| Insulin growth factor binding protein 3                | <i>IGFBP3</i>  | NM_174556.1           | F: CGCCTGCGCCCTTACC                                            | 57        |
|                                                        |                |                       | R: TTCTTCCGACTCACTGCCATT                                       |           |
| Insulin-like 3 (Leydig cell)                           | <i>INSL3</i>   | NM_174365.2           | F: GGCGACCGTGAGCTCCT<br>R: ACTGGCCATCAGCCCATG                  | 62        |

|                                                               |                |                |                                                          |     |
|---------------------------------------------------------------|----------------|----------------|----------------------------------------------------------|-----|
| Luteinizing hormone/<br>choriogonadotropin receptor           | <i>LHCGR</i>   | NM_174381.1    | F: GCCACTGCTGTGCTTTTAGAAA<br>R: CCAGCCACTCAGTTCACTCTCA   | 158 |
| Latent transforming growth<br>factor beta binding protein 1   | <i>LTBP1</i>   | NM_001103091.1 | F: GATTTGGGCCAGATCCTACCT<br>R: CGGTAACACGGCCCTTTCT       | 79  |
| Latent transforming growth<br>factor beta binding protein 2   | <i>LTBP2</i>   | NM_174385.2    | F: CAGTCGAGTTCAGCGAGATCTG<br>R: TCTGTGTACGTGGTCTGTCCAAAC | 88  |
| Latent transforming growth<br>factor beta binding protein 3   | <i>LTBP3</i>   | NM_001192738.1 | F: CACTGCTGCCTTCAAGGAGATC<br>R: TCACTTTCGCCCTGAATGGT     | 90  |
| Latent transforming growth<br>factor beta binding protein 4   | <i>LTBP4</i>   | XM_010814978.1 | F: CACCATGGCCGATGTACTGAT<br>R: CTTCGGTGTTAGTGCAATGGC     | 82  |
| Nuclear receptor subfamily 2,<br>group F, member 2            | <i>NR2F2</i>   | NM_174402.3    | F: ACGGATCTTCCAAGAGCAAG<br>R: TTCCACATGGGCTACATCAG       | 130 |
| Retinoic acid receptor<br>responder (tazarotene induced)<br>1 | <i>RARRES1</i> | NM_001075430.2 | F: AAGCCCCTTGAATGCAGTCA<br>R: TGGGTCTCAGAGATGGAGCAA      | 65  |
| Ribosomal protein L19                                         | <i>RPL19</i>   | NM_001040516.1 | F: GATCCGGAAGCTGATCAAAG<br>R: TACCCATATGCCTGCCTTTC       | 113 |
| Transforming growth factor<br>beta 1                          | <i>TGFB1</i>   | NM_001166068.1 | F: CTGCTGAGGCTCAAGTTAAAAGTG<br>R: CAGCCGGTTGCTGAGGTAG    | 90  |
| Transforming growth factor<br>beta 1 induced transcript 1     | <i>TGFB1I1</i> | NM_001035313.1 | F: TCCCCTGTTCTCCCAAAGC<br>R: GCCCTGAGGCTGGAAGATG         | 109 |
| Transforming growth factor<br>beta 2                          | <i>TGFB2</i>   | NM_001113252.1 | F: AAGCCAGAGTGCCTGAACAAC<br>R: TTTCACGACTTTGCTGTCAATGT   | 101 |
| Transforming growth factor<br>beta 3                          | <i>TGFB3</i>   | NM_001101183.1 | F: TGCGTACCCAGGACTTG<br>R: TGTTAGACAGCTGCTCCACTTTG       | 79  |

|                                                            |               |                |                                                            |     |
|------------------------------------------------------------|---------------|----------------|------------------------------------------------------------|-----|
| Transforming growth factor,<br>beta receptor I             | <i>TGFBR1</i> | NM_174621.2    | F: CAGAGTGGGAACAAAAAGGTACATG<br>R: CATTGCATAGATGTCAGCACGTT | 100 |
| Transforming growth factor,<br>beta receptor II (70/80kDa) | <i>TGFBR2</i> | NM_001159566.1 | F: AACGTAGTAACTCCCTGCACTG<br>R: AAACAAACGTGGGTGTGACG       | 141 |
| Transforming growth factor,<br>beta receptor III           | <i>TGFBR3</i> | XM_005204336.2 | F: TGCACTTTCCTATCCCACAAGCCG<br>R: CCAGATCATTGAGGCATCCAGCG  | 197 |

F is forward and R is the reverse primer sequence.
